# Supplementary material for: Discovery of a dual inhibitor of NQO1 and GSTP1 for treating glioblastoma
Source: Springer Nature journal article supplement (doi:10.1186/s13045-020-00979-y), 2020-10-21
Supplement: MOESM1 [file 18508554]

# Supplementary Figure 1

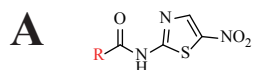

| Compound | Structure                                                                         | IC50 (μM)<br>U87MG/<br>EGFRvIII | IC50<br>(μM)<br>U87MG |
|----------|-----------------------------------------------------------------------------------|---------------------------------|-----------------------|
| 20       | 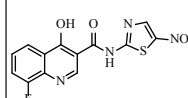 | 1.42                            | 18.94                 |
| 13       |  | 1.55                            | 13.32                 |
| 11       |  | 1.89                            | 17.11                 |
| 12       |  | 2.37                            | 21.14                 |
| 14       |  | 2.61                            | 19.83                 |

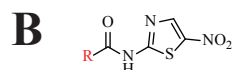

| Compound | Structure                                                                          | IC50(μM)<br>U87MG/<br>EGFRvIII | IC50<br>(μM)<br>U87MG |
|----------|------------------------------------------------------------------------------------|--------------------------------|-----------------------|
| 19       | 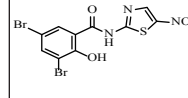 | 3.03                           | 35.41                 |
| 1        |  | 3.59                           | 33.12                 |
| 2        |  | 4.81                           | 36.81                 |
| 16       |  | 4.83                           | 25.12                 |
| 18       |  | 5.03                           | 39.16                 |

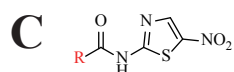

| Compound | Structure                                                                           | IC50(μM)<br>U87MG/<br>EGFRvIII | IC50<br>(μM)<br>U87MG |
|----------|-------------------------------------------------------------------------------------|--------------------------------|-----------------------|
| 7        | 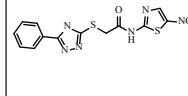 | 4.81                           | 25.11                 |
| 8        |  | 5.35                           | 19.98                 |
| 6        |  | 5.79                           | 23.12                 |
| 10       |  | 7.14                           | 26.81                 |
| 9        |  | 7.23                           | 25.17                 |

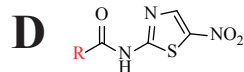

| Compound | Structure                                                                            | IC50(μM)<br>U87MG/<br>EGFRvIII | IC50<br>(μM)<br>U87MG |
|----------|--------------------------------------------------------------------------------------|--------------------------------|-----------------------|
| 17       | 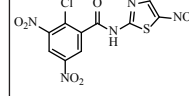 | 3.61                           | 15.33                 |
| 15       |  | 6.22                           | 27.64                 |
| 3        |  | 6.98                           | 31.74                 |
| 4        |  | 7.18                           | 25.31                 |
| 5        |  | 8.11                           | 31.15                 |

# Supplementary Figure 2

**A**

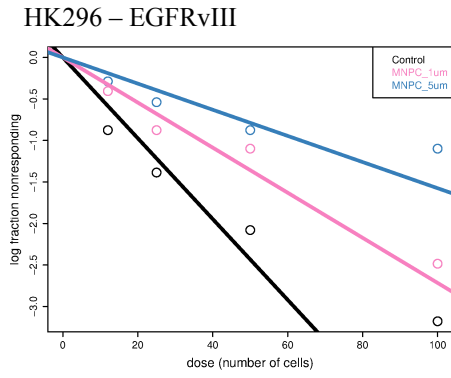

HK296 – EGFRvIII

| Group    | Stem cell frequency | p-value vs control |
|----------|---------------------|--------------------|
| Control  | 1/21.1              | -                  |
| MNPC_1µM | 1/37.3              | 0.0045             |
| MNPC_5µM | 1/64                | 6.17 E-08          |

**B**

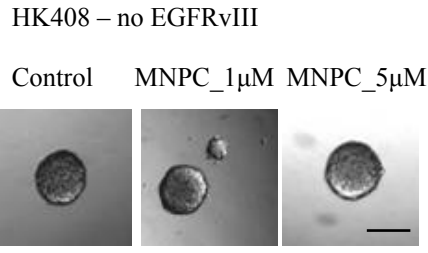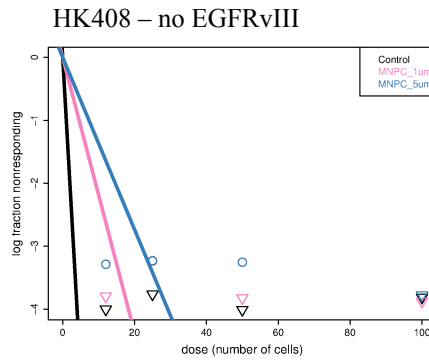

**C**

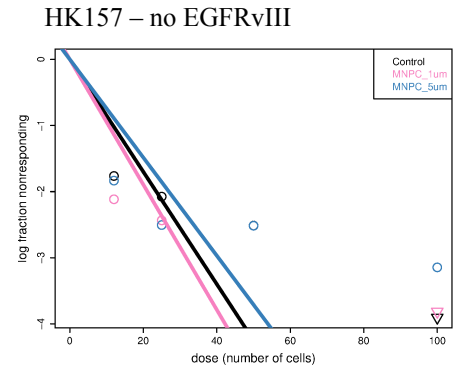

**D**

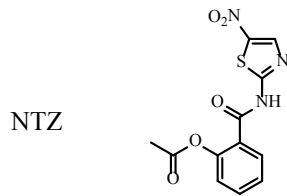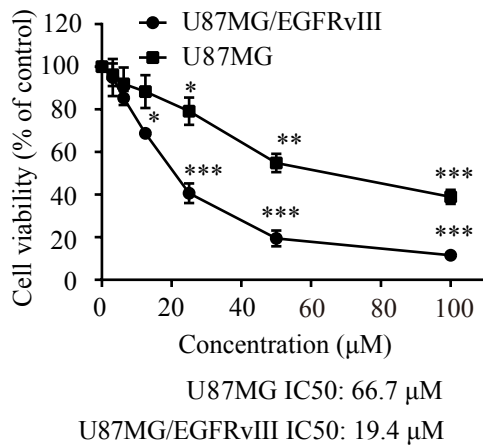

**E**

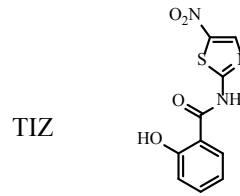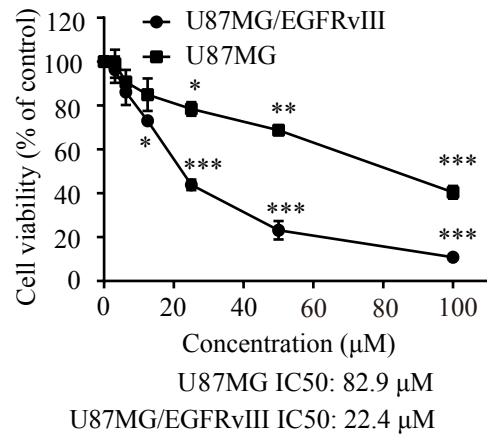

**F**

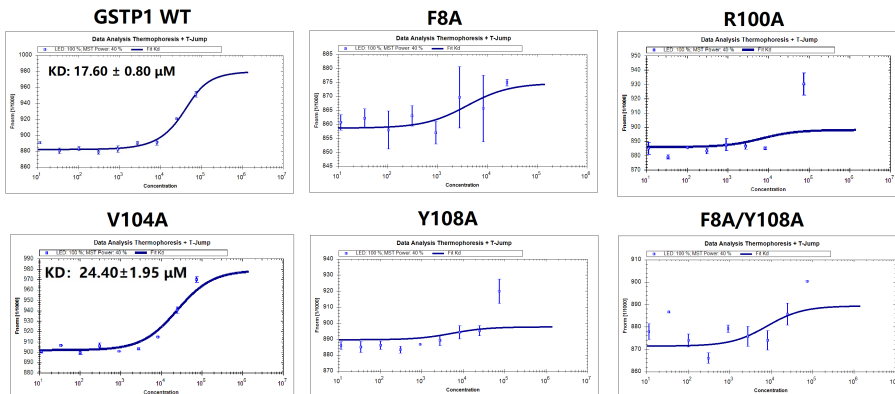

**G**

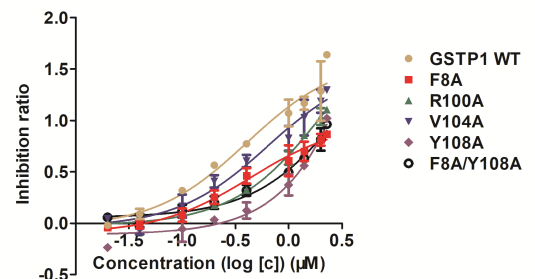

# Supplementary Figure 3

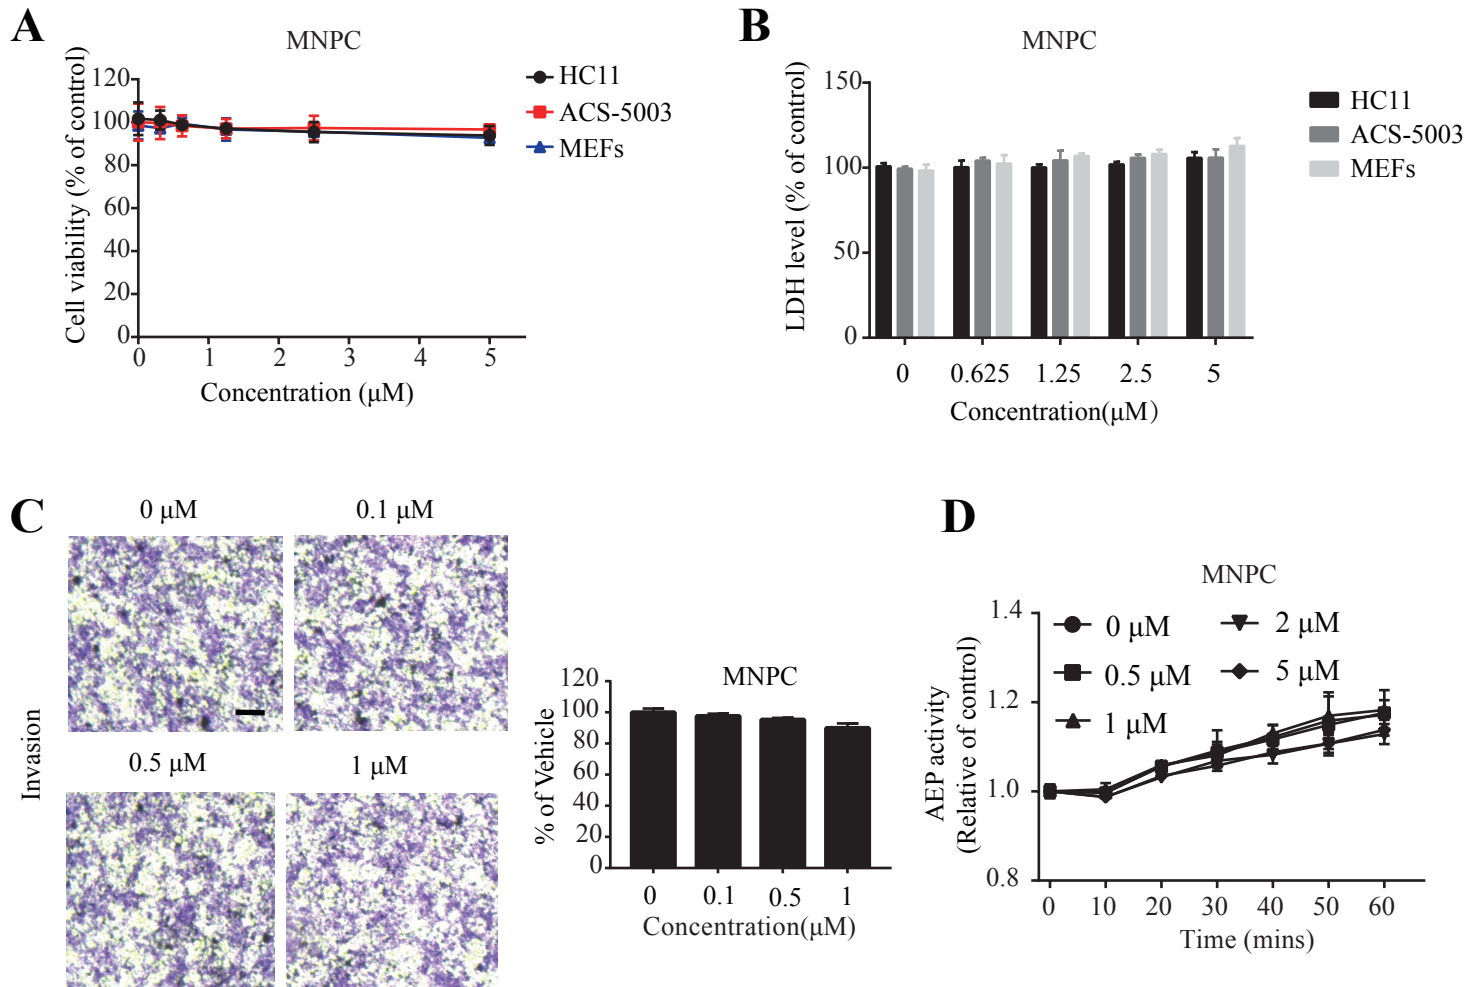

# Supplementary Figure 4

**A**

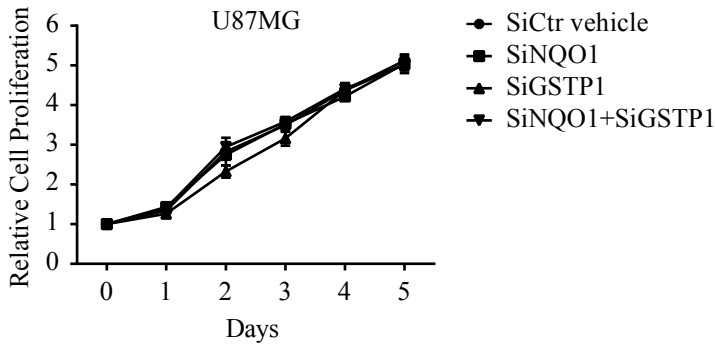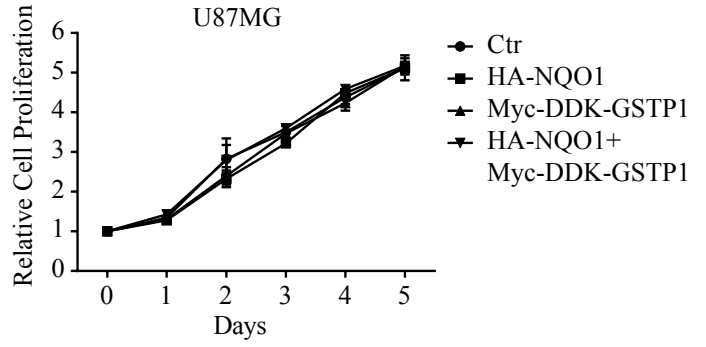

**B**

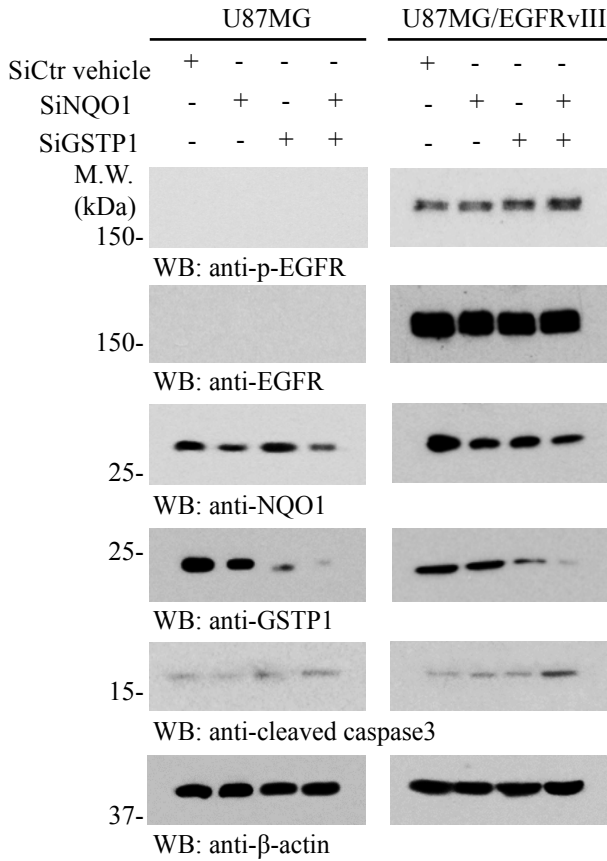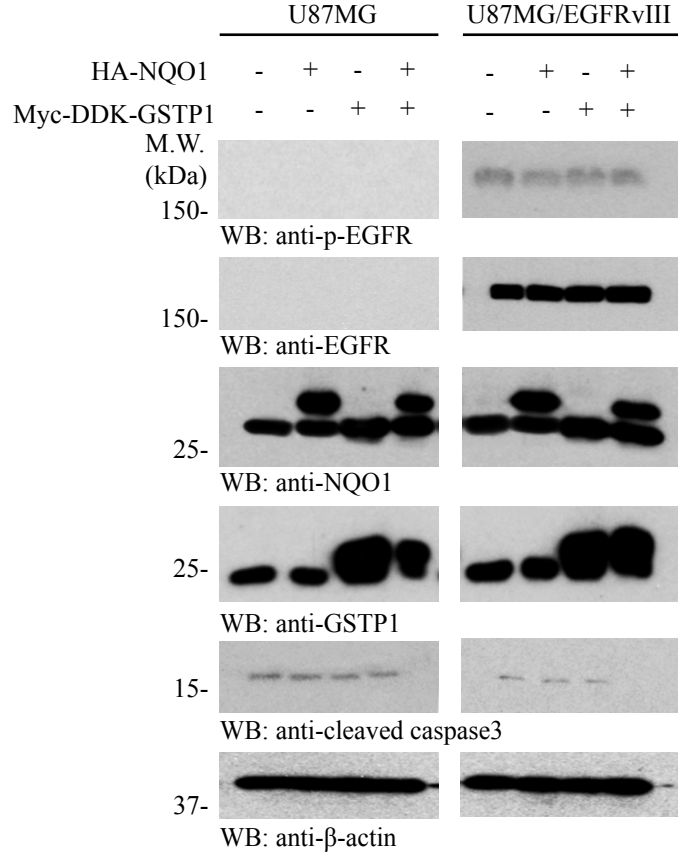

# Supplementary Figure 5

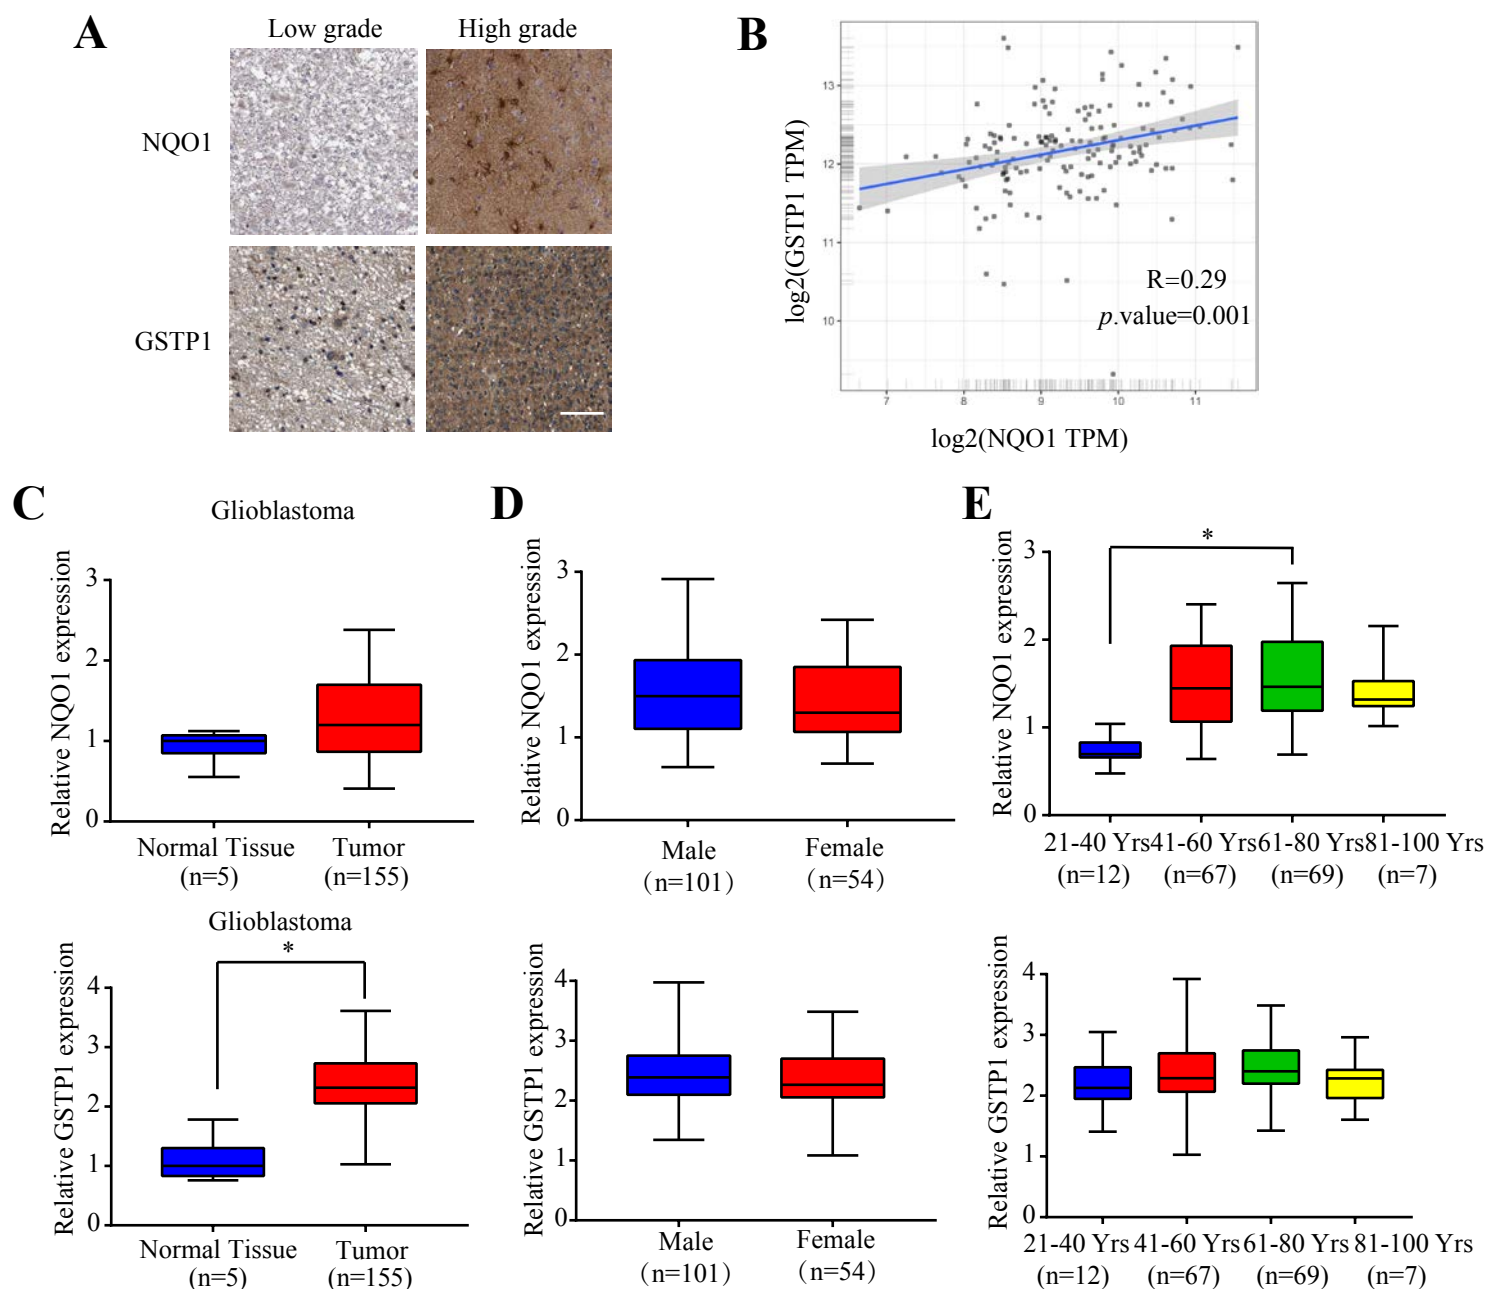

# Supplementary Figure 6

**A**

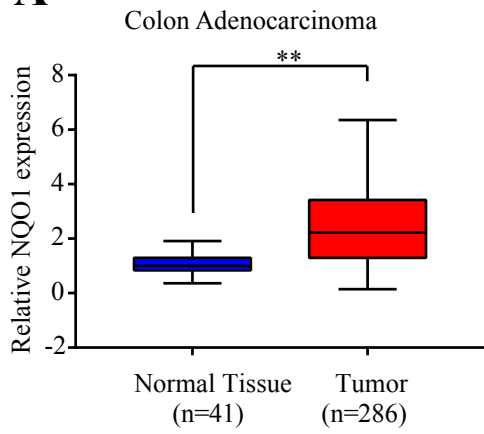

**B**

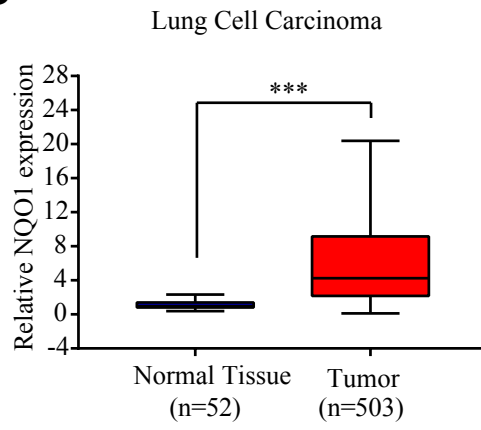

**C**

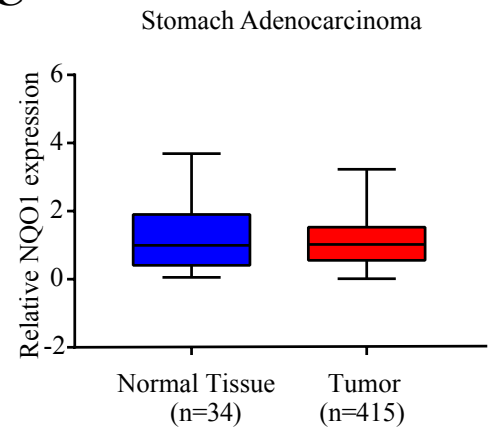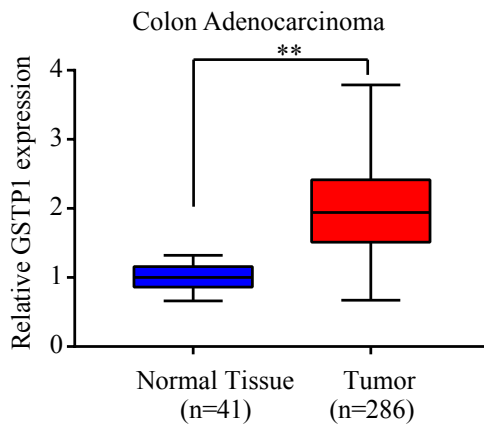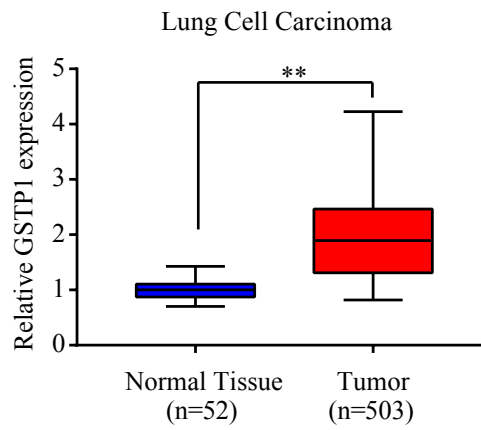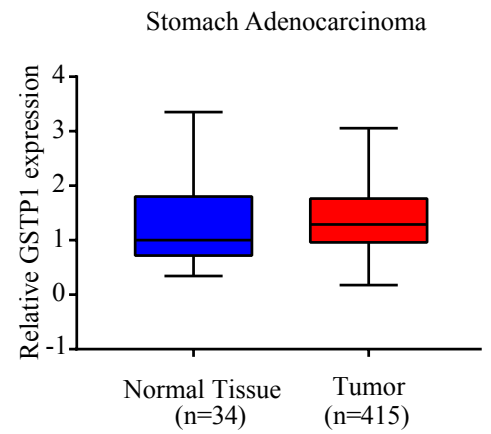

# Supplementary Figure 7

**A**

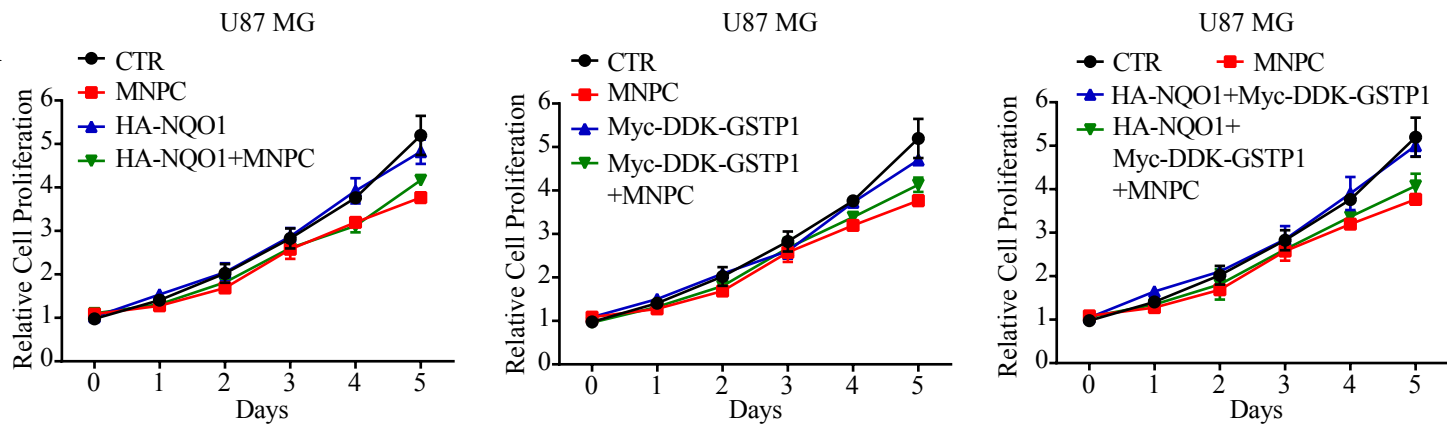

**B**

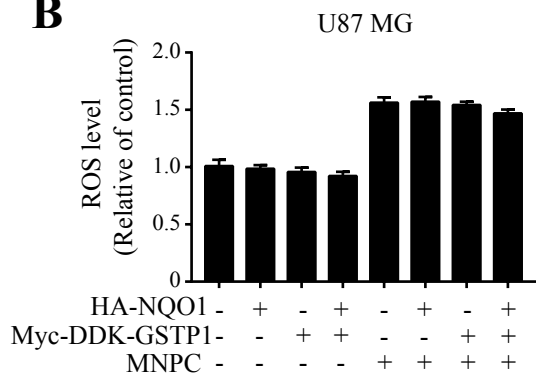

**C**

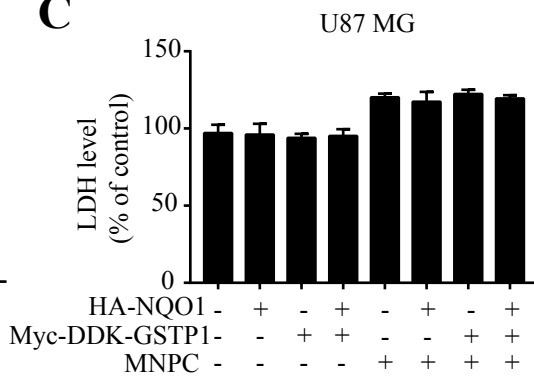

# Supplementary Figure 8

**A**

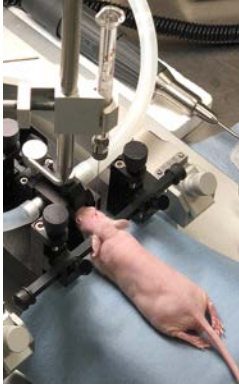

**B**

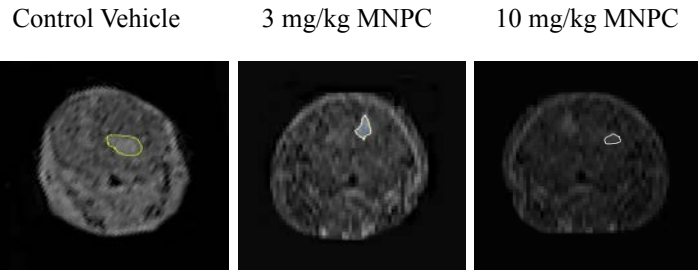

**C**

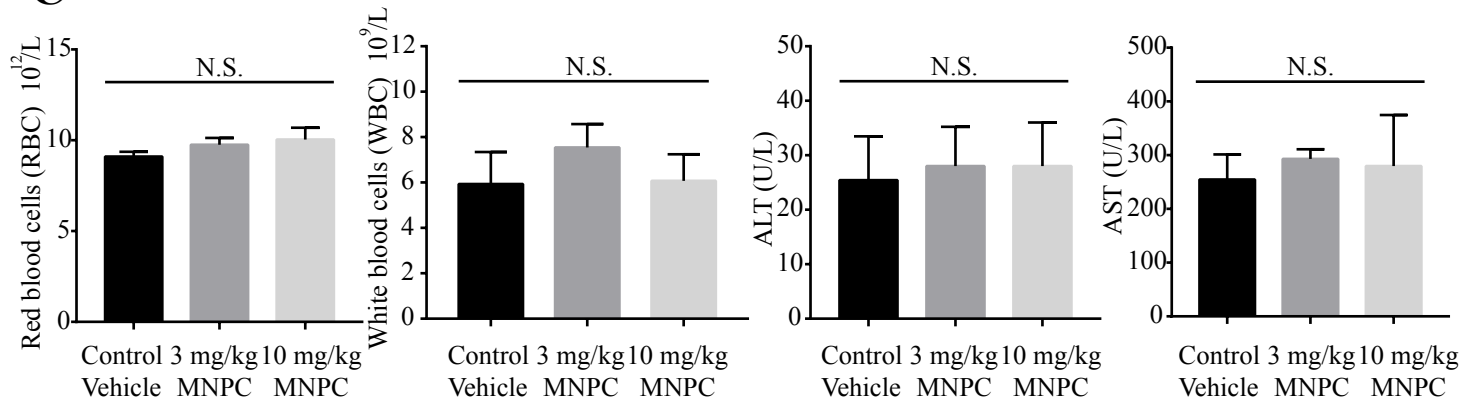



**Supplementary Table 1. Binding affinities and inhibitory effects of MNPC with GSTP1 and its mutants.**

| Protein   | Kd ( $\mu\text{M}$ ) <sup>a</sup> | IC <sub>50</sub> ( $\mu\text{M}$ ) |
|-----------|-----------------------------------|------------------------------------|
| GSTP1 WT  | 17.60 $\pm$ 0.80                  | 0.40 $\pm$ 0.39                    |
| F8A       | n.b. <sup>b</sup>                 | 2.42 $\pm$ 0.36                    |
| R100A     | n.b.                              | 2.37 $\pm$ 0.38                    |
| V104A     | 24.40 $\pm$ 1.95                  | 0.65 $\pm$ 0.19                    |
| Y108A     | n.b.                              | 25.74 $\pm$ 1.41                   |
| F8A/Y108A | n.b.                              | 4.01 $\pm$ 0.60                    |

Each value was expressed as mean  $\pm$  SEM(n=3).

<sup>a</sup>The Kd value is automatic calculated by the curve fitting, and presents as means  $\pm$  SEM for three experiments.

<sup>b</sup>n.b. is no clear binding detected in the MST measurement.

**Supplementary Table 2. Crystallographic Data and Refinement Statistics.**

| Parameters                            | NQO1/MNPC complex        | GSTP1                  |
|---------------------------------------|--------------------------|------------------------|
| <b>Data collection</b>                |                          |                        |
| Space group                           | P41                      | P212121                |
| Cell dimensions                       |                          |                        |
| a, b, c (Å)                           | 47.882, 147.882, 209.791 | 69.655, 82.179, 89.324 |
| $\alpha$ , $\beta$ , $\gamma$ (°)     | 90, 90, 90               | 90, 90, 90             |
| Resolution range (Å)                  | 32.66-2.50(2.54-2.50)    | 24.11-1.58(1.62-1.58)  |
| Rsym (%)                              | 9.6 (60.5)               | 9.4 (23.8)             |
| Completeness (%) <sup>a</sup>         | 99.8 (99.8)              | 99.7 (99.4)            |
| Redundancy                            | 6.8 (6.0)                | 5.4 (5.2)              |
| $I/\sigma I^a$                        | 13.9 (1.8)               | 32.6 (10.9)            |
| <b>Refinement</b>                     |                          |                        |
| Total reflections                     | 154628                   | 70461                  |
| $R_{\text{work}}/R_{\text{free}}^c$   | 0.222, 0.264             | 0.200, 0.223           |
| No. atoms                             |                          |                        |
| Protein                               | 25956                    | 3378                   |
| Ligand                                | 853                      | 33                     |
| Water                                 | 249                      | 426                    |
| Average $B$ -factor (Å <sup>2</sup> ) | 36.3                     | 11.0                   |
| Ramachandran Plot (%)                 |                          |                        |
| Favored                               | 94.76                    | 97.14                  |
| Allowed                               | 5.14                     | 2.62                   |
| Outliers                              | 0.1                      | 0.24                   |
| Root mean square deviations           |                          |                        |
| R.m.s.d. bond lengths (Å)             | 0.008                    | 0.005                  |
| R.m.s.d. bond angle (°)               | 0.946                    | 0.875                  |

Values in parenthesis are for highest resolution shell. 5 % of the data was used in the Rfree calculation.

**Supplementary Table 3. The primers used for mutagenesis.**

|                    | Nucleotide sequence               |
|--------------------|-----------------------------------|
| F8A forward        | AAGCCAGTATACTCCGCTATC             |
| F8A reverse        | CGAACTGGGGCATAGACCACGGTGTAGGG     |
| F8A forward1       | TGGTCTATGCCCCAGTTCGAGGCCGCTGC     |
| F8A reverse1       | GATAGCGGAGTGTATACTGGCTT           |
| R100Aforward       | AAGCCAGTATACTCCGCTATC             |
| R100A reverse      | AGATGAGGGAGATGTATTTGCAGGCGAGGTCCT |
| R100A forward1     | CTGCAAATACATCTCCCTCATCTACACCAACTA |
| R100A reverse1     | GATAGCGGAGTGTATACTGGCTT           |
| V104A forward      | AAGCCAGTATACTCCGCTATC             |
| V104A reverse      | ATGAGGGAGGCGTATTTGCAGCGGAGGTC     |
| V104A forward1     | GCAAATACGCCTCCCTCATCTACACCAAC     |
| V104A reverse1     | GATAGCGGAGTGTATACTGGCTT           |
| Y108A forward      | AAGCCAGTATACTCCGCTATC             |
| Y108A reverse      | CGATGAGGGAGATGTATTTGCAGCGGAGGTCCT |
| Y108A forward1     | CTGCAAATACATCTCCCTCATCGCCACCAACTA |
| Y108A reverse1     | GATAGCGGAGTGTATACTGGCTT           |
| F8A/Y108A forward  | AAGCCAGTATACTCCGCTATC             |
| F8A/Y108A reverse  | CGATGAGGGAGATGTATTTGCAGCGGAGGTCCT |
| F8A/Y108A forward1 | CTGCAAATACATCTCCCTCATCGCCACCAACTA |
| F8A/Y108A reverse1 | GATAGCGGAGTGTATACTGGCTT           |
